# Supplementary material for: Narrow funnel-like interaction energy distribution is an indicator of specific protein interaction partners
Source: Research Square preprint supplement (doi:10.21203/rs.3.rs-1412786/v2), 2022-03-24

**Supplementary Table 1**. Criteria to distinguish narrow funnel-like interaction energy distribution of whole interaction pairs


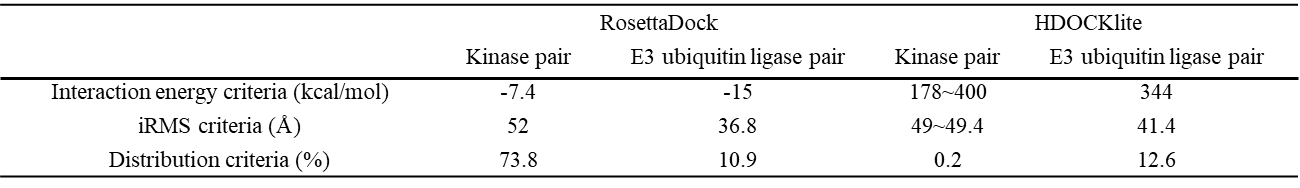


**Supplementary Table 2**. Criteria to distinguish narrow funnel-like interaction energy distribution of interaction pairs with high-accuracy structure prediction results.


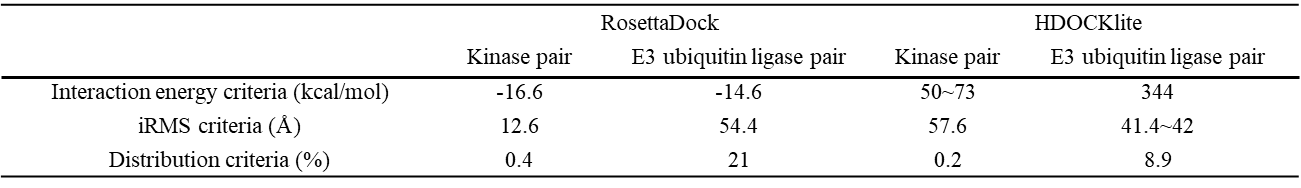

Supplement: Supplementary file 1 [file 324524839567c94017e89174.docx]
